# Supplementary material for: Tuning of EAG K+ channel inactivation: Molecular determinants of amplification by mutations and a small molecule
Source: PubMed Central journal article supplement — J Gen Physiol. 2012 Sep;140(3):307–24. doi: 10.1085/jgp.201210826 (PMC3434097; doi:10.1085/jgp.201210826), 2012-09
Supplement: supp_jgp.201210826_JGP_201210826_sm.pdf [file supp_jgp.201210826_JGP_201210826_sm.pdf]

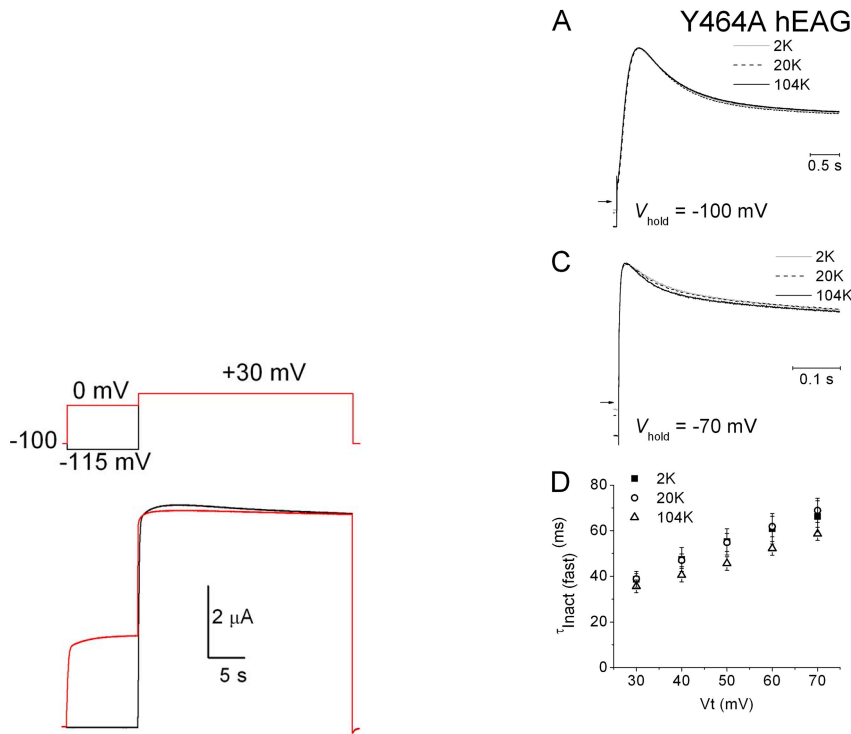

**Figure S1.** Slow inactivation of WT hEAG1 currents during a long depolarizing pulse. (Top) From a  $V_h$  of  $-100$  mV, 10-s  $V_{pre}$ s to  $-115$  and  $0$  mV were applied, each followed by a 30-s-long test pulse to  $+30$  mV. (Bottom) Note that test current elicited after the prepulse to  $-115$  mV was larger than after the prepulse to  $0$  mV, but that currents relax (inactivate) to a common level by the end of the 30-s test pulse. Traces represent average currents recorded from five oocytes.

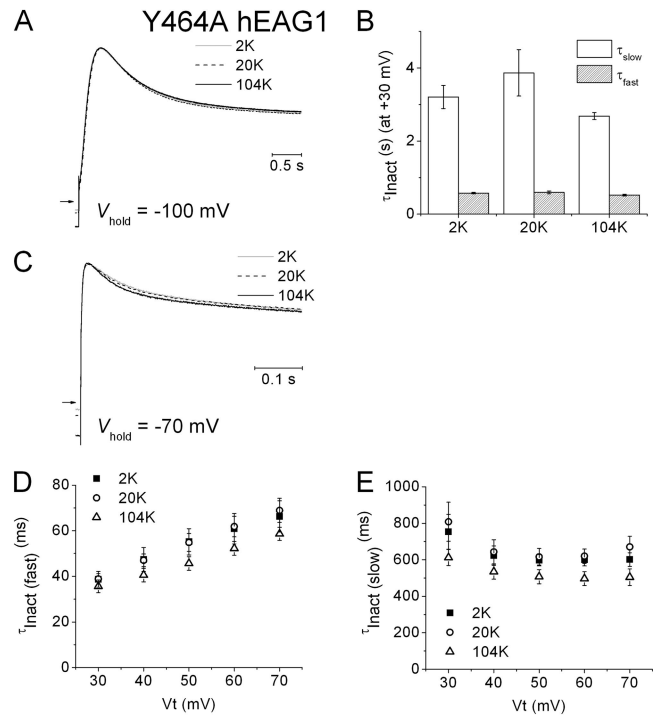

**Figure S2.** Y464A-induced inactivation in hEAG1 is not slowed by elevated  $[K^+]_e$ . (A) Normalized and superimposed traces of Y464A hEAG1 currents at  $+30$  mV elicited from a  $V_h$  of  $-100$  mV in  $2$  mM  $[K^+]_e$  (gray trace),  $20$  mM  $[K^+]_e$  (dashed trace), and  $104$  mM  $[K^+]_e$  (black trace). (B) Inactivation time constants at  $+30$  mV in different  $[K^+]_e$ . The decay phase of currents elicited from a  $V_h$  of  $-100$  mV was fitted with a two-exponential function ( $n = 4$ ). There was no significant effect of  $[K^+]_e$  on either time constant ( $P > 0.05$ ). (C) Normalized and superimposed traces of Y464A hEAG1 currents at  $+50$  mV elicited from a  $V_h$  of  $-70$  mV in  $2$  mM  $[K^+]_e$  (gray trace),  $20$  mM  $[K^+]_e$  (dashed trace), and  $104$  mM  $[K^+]_e$  (black trace). (D and E) The decay phase of currents at the indicated  $V_t$ , elicited from a  $V_h$  of  $-70$  mV, was fitted with a two-exponential function to determine inactivation time constants in different  $[K^+]_e$  ( $n = 5$ ).  $\tau_{inact(fast)}$  (D) for  $[K^+]_e$  of  $104$  mM was less than  $[K^+]_e = 2$  mM ( $P = 0.03$ ) or  $[K^+]_e = 20$  mM ( $P = 0.02$ ).  $\tau_{inact(slow)}$  (E) for  $[K^+]_e$  of  $104$  mM was less than  $[K^+]_e = 2$  mM ( $P = 0.01$ ) or  $[K^+]_e = 20$  mM ( $P = 0.005$ ).

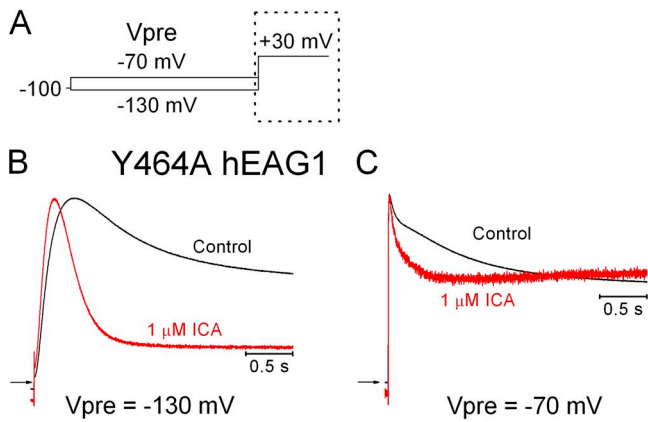

**Figure S3.** ICA accelerates onset of Y464A hEAG1 current inactivation. (A) Voltage-pulse protocol used to elicit currents plotted in B and C. From a  $V_h$  of  $-100$  mV, 10-s  $V_{pre}$ s to  $-130$  and  $-70$  mV preceded a 4.5-s test pulse to  $+30$  mV. Currents recorded during the test pulse (boxed region) are shown in B and C. (B) Normalized and superimposed traces of Y464A hEAG1 currents at  $+30$  mV elicited after  $V_{pre}$  to  $-130$  mV under control conditions (black trace) and after  $1 \mu\text{M}$  ICA (red trace). (C) Normalized and superimposed traces of Y464A hEAG1 currents at  $+30$  mV elicited after  $V_{pre}$  to  $-70$  mV under control conditions (black trace) and after  $1 \mu\text{M}$  ICA (red trace).

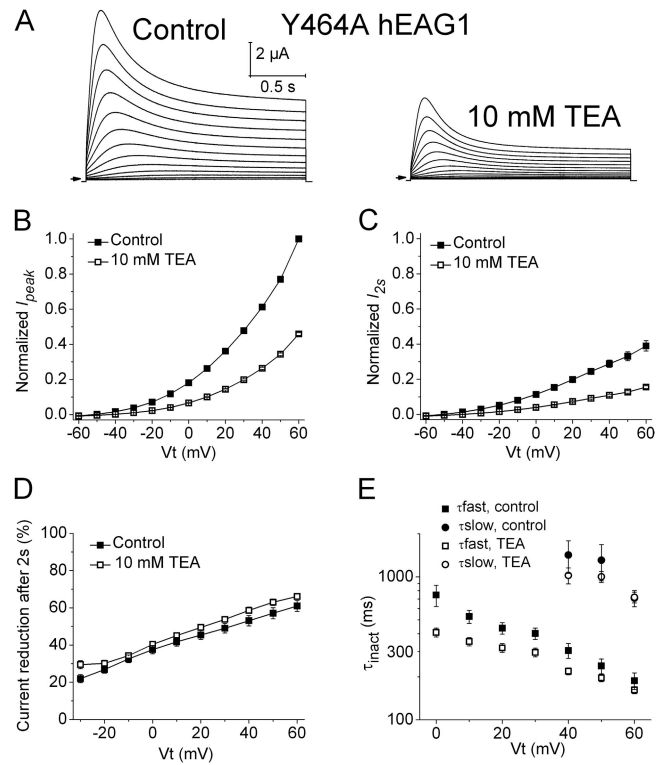

**Figure S4.** Extracellular TEA blocks Y464A hEAG1 current but does not slow rate of inactivation. (A) Effect of  $10$  mM TEA on currents elicited with voltage steps varying from  $-60$  to  $+60$  mV in  $10$ -mV increments from a  $V_h$  of  $-100$  mV. (B) Normalized peak I-V relationships for hEAG1 channels recorded under control conditions (■) and after the application of  $10$  mM TEA (□) to the external solution ( $n = 9$ ). (C) Normalized end of 2-s pulse I-V relationships recorded under control conditions (■) and after the application of  $10$  mM TEA (□;  $n = 9$ ). (D) Voltage-dependent reduction in current amplitude from peak to end of 2-s pulse under control conditions (■) and after the application of  $10$  mM TEA (□;  $n = 9$ ). (E) Effect of  $10$  mM TEA on the time constants for onset of inactivation plotted as a function of  $V_t$ . The decay phase of currents elicited from a  $V_h$  of  $-100$  mV was fitted with a two- or one-exponential function. TEA accelerated the rate of fast inactivation (two-way ANOVA;  $P < 0.0001$ ). In B–D, the SEM bars are smaller than symbol size.

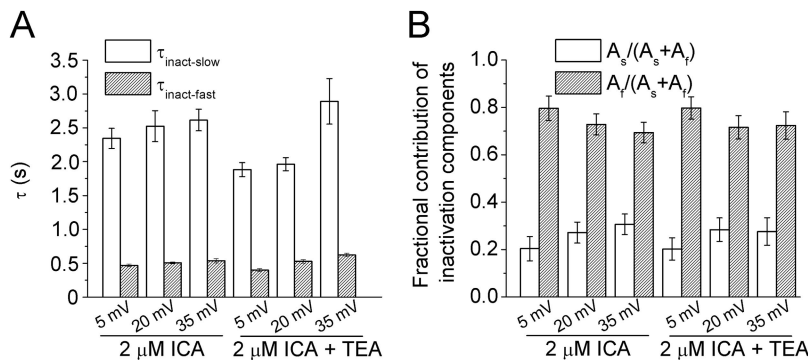

**Figure S5.** ICA-enhanced inactivation of WT hEAG1 is not slowed by external TEA. (A) Comparison of fast and slow inactivation time constants. The decay phase of currents recorded during a 10-s pulse to  $+5$ ,  $+20$ , and  $+35$  mV was fitted with a two-exponential function to estimate the time constants for inactivation in the presence of  $2 \mu\text{M}$  ICA with and without the coapplication of  $10$  mM of extracellular TEA. TEA reduced the time constants of inactivation for pulse to  $+5$  mV ( $P < 0.05$ ) but had no effect at other potentials. (B) Comparison of relative amplitudes for fast ( $A_f$ ) and slow ( $A_s$ ) components of inactivation at the indicated  $V_t$  ( $n = 5$ ).

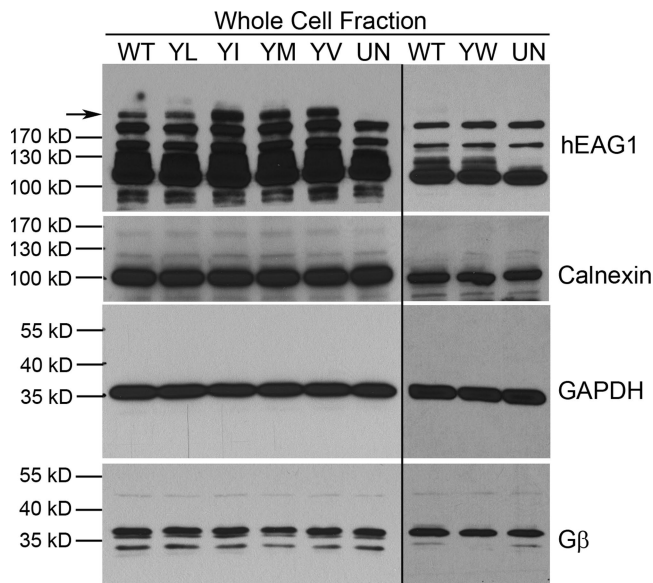

**Figure S6.** Western blots for hEAG1, calnexin, GAPDH, and G $\beta$  in whole cell fraction of oocytes injected with WT, Y464L (YL), Y464I (YI), Y464M (YM), Y464V (YV), and Y464W (YW) *hEAG1* cRNA, or uninjected (UN). The three right columns are from a different batch of oocytes and different gel. hEAG1 antibody showed reactivity to many intracellular proteins in the whole cell fractions, overlapping the hEAG1 protein (113-kD) signal. A selective high molecular weight signal is visible (denoted by arrow) only in the cRNA-injected groups. Calnexin is an ER protein; GAPDH and G $\beta$  are cytoplasmic proteins.

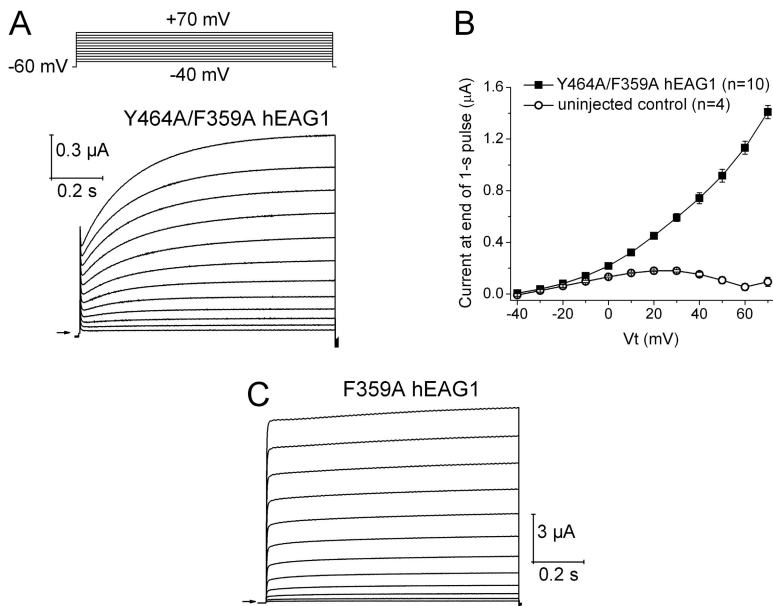

**Figure S7.** F359A rescues gating of Y464A hEAG1. (A) Voltage-pulse protocol and currents for F359A/Y464A hEAG1 channels. Currents were elicited with 1-s voltage pulses applied in 10-mV increments to a variable  $V_t$ .  $V_h$  was  $-60$  mV, and the interpulse interval was 15 s. (B) Peak I-V relationship for F359A/Y464A hEAG1 (■) and uninjected control cells (□). (C) Current recordings for F359A hEAG1 using the pulse protocol shown in A.

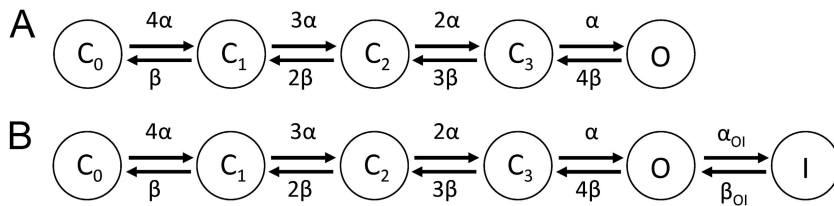

**Figure S8.** Schematics of simple linear Markov models of EAG1 current. (A) Five-state model. (B) Six-state model.

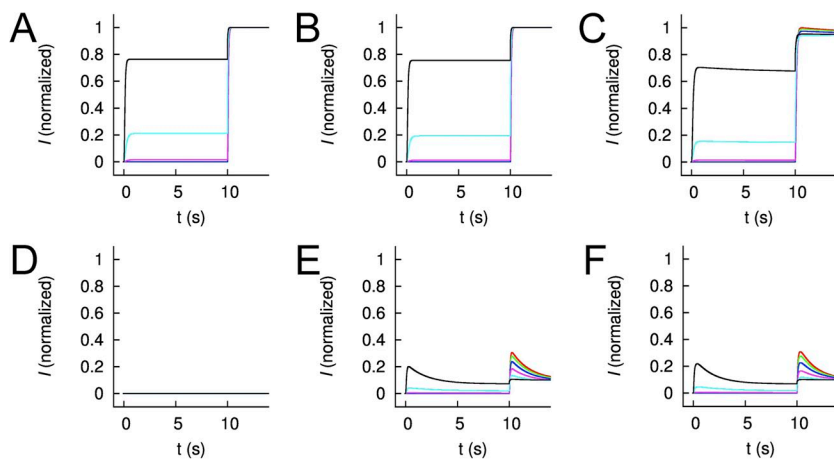

**Figure S9.** Simulated EAG1 current ( $I$ ) and effect of ICA determined with different Markov models. In each panel, currents are shown in response to 10-s pulses to a  $V_{pre}$  of  $-130$ ,  $-100$ ,  $-70$ ,  $-40$ ,  $-10$ , and  $+20$  mV, followed by a test pulse to  $+30$  mV. (A–C) Simulated control  $I$  for 5-, 6-, and 10-state models, respectively. (D–F) Simulated  $I$  in the presence of  $5 \mu\text{M}$  ICA for 5-, 6-, and 12-state models, respectively. Color coding of traces is the same as noted in Fig. 11.

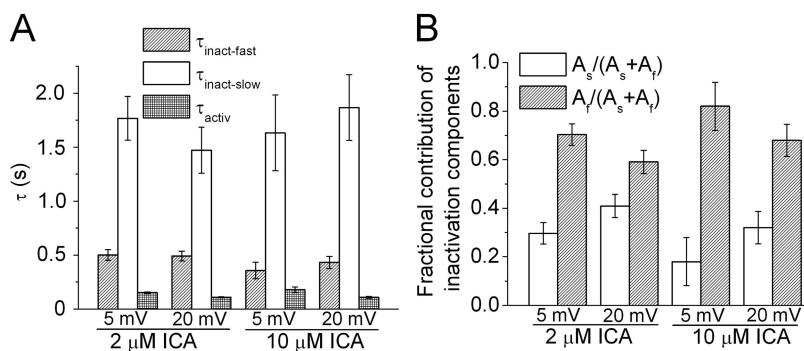

**Figure S10.** Kinetics of WT hEAG1 channel currents is similar in the presence of  $2$  or  $10 \mu\text{M}$  ICA. (A) Comparison of activation and inactivation time constants. Currents recorded during 10-s pulses to  $+5$  and  $+20$  mV were fitted with a three-exponential function to estimate a single time constant for the onset of activation and two time constants for onset of inactivation in the presence of  $2$  or  $10 \mu\text{M}$  ICA ( $n = 4-5$ ). (B) Comparison of relative amplitudes for fast ( $A_f$ ) and slow ( $A_s$ ) components of inactivation at the indicated  $V_i$ . [ICA] did not significantly alter any measure of inactivation ( $P > 0.05$ ).

*Table S1*  
*Features for model fitting and their fit errors*

| Feature                 | Weighting factor | Control | 2 $\mu$ M ICA | 5 $\mu$ M ICA | 10 $\mu$ M ICA | Y464A |
|-------------------------|------------------|---------|---------------|---------------|----------------|-------|
| $I_{pre-max}$           | 1                | 0.072   | 0.217         | 0.448         | 0.558          | 0.115 |
| $I_{pre-end}$           | 1                | 0.082   | 0.479         | 0.810         | 0.539          | 0.108 |
| $\tau_{pre-slow}$       | 0.1              | 0.057   | 0.061         | 0.284         | 0.259          | 0.068 |
| $\tau_{pre-fast}$       | 0.5              | 0.074   | 0.137         | 0.345         | 0.207          | 0.098 |
| $I_{max}$               | 2                | 0.267   | 0.110         | 0.495         | 0.552          | 0.237 |
| $I_{end}$               | 2                | 0.249   | 0.270         | 0.251         | 0.177          | 0.274 |
| $I_{late}$              | 2                | 0.079   | 0.002         | 0.032         | 0.012          | 0.012 |
| $\tau_{test-slow}$      | 0.25             | 0.162   | 0.143         | 0.198         | 0.188          | 0.161 |
| $\tau_{test-fast}$      | 0.25             | 0.222   | 0.185         | 0.225         | 0.223          | 0.181 |
| $\text{Max} \sum_j C_j$ | 2                | 0.004   | 0.020         | 0.002         | 0.011          | 0.004 |
| $\text{Max} \sum_j O_j$ | 1                | 0.189   | 0.020         | 0.130         | 0.006          | 0.055 |

$E_i = \|f_{m,i} - f_{e,i}\|_2 / \|f_{e,i}\|_2$ . Weighting factors were applied to emphasize or deemphasize features.  $I_{pre-max}$  maximal normalized current during prepulse;  $I_{pre-end}$  normalized current at the end of prepulse;  $\tau_{pre-slow}$  slow time constant from biexponential fit of current during prepulse;  $\tau_{pre-fast}$  fast time constant from biexponential fit of current during prepulse;  $I_{max}$  maximal normalized current during test pulse;  $I_{end}$  normalized current at the end of test pulse;  $I_{late}$  normalized current after 20-s test pulse;  $\tau_{test-slow}$  slow time constant from biexponential fit of current during test pulse;  $\tau_{test-fast}$  fast time constant from biexponential fit of current during test pulse.

*Table S2*  
*Initial values for models*

| Models   | States                         | Symbol            | Value |
|----------|--------------------------------|-------------------|-------|
| 5-state  | Zereth closed state            | $C_0$             | 1     |
|          | First-third closed state       | $C_1, \dots, C_3$ | 0     |
|          | Open state                     | $O$               | 0     |
| 6-state  | Zereth closed state            | $C_0$             | 1     |
|          | First-third closed state       | $C_1, \dots, C_3$ | 0     |
|          | Open state                     | $O$               | 0     |
|          | Inactivated state              | $I$               | 0     |
| 10-state | Zereth closed state            | $C_0$             | 0.5   |
|          | First-third closed state       | $C_1, \dots, C_3$ | 0     |
|          | Open state                     | $O$               | 0     |
|          | Zereth inactivated state       | $I_0$             | 0.5   |
|          | First-fourth inactivated state | $I_1, \dots, I_4$ | 0     |
| 12-state | Zereth closed state            | $C_0$             | 0.5   |
|          | First-third closed state       | $C_1, \dots, C_3$ | 0     |
|          | First and second open state    | $O_1, O_2$        | 0     |
|          | Zereth inactivated state       | $I_0$             | 0.5   |
|          | First-fifth inactivated state  | $I_1, \dots, I_5$ | 0     |

*Table S3*  
*Rate constant parameters for models*

| Parameter                                 | Symbol         | Control   | 2 $\mu$ M | 5 $\mu$ M  | 10 $\mu$ M | Y464A    | Unit     |
|-------------------------------------------|----------------|-----------|-----------|------------|------------|----------|----------|
| Closed–closed and closed–open transitions | $\alpha_0$     | 15.620309 | 10.440446 | 11.631091  | 11.148303  | 6.617790 | $s^{-1}$ |
|                                           | $z_\alpha$     | 0.481494  | 0.533413  | 0.440578   | 0.329040   | 0.600499 |          |
|                                           | $\beta_0$      | 13.260124 | 4.574153  | 11.332073  | 11.273359  | 3.100676 | $s^{-1}$ |
| Closed–inactivated transitions            | $z_\beta$      | 0.004189  | 0.032021  | 0.029397   | 0.007126   | 0.032085 |          |
|                                           | $\alpha_{CI0}$ | 0.001194  | 0.001473  | 0.000004   | 0.014683   | 0.002182 | $s^{-1}$ |
|                                           | $\beta_{CI0}$  | 0.086253  | 0.065298  | 0.015226   | 0.027916   | 0.281901 | $s^{-1}$ |
|                                           | $\alpha_{CI1}$ | 0.025614  | 0.129125  | 0.164319   | 0.152015   | 0.084866 | $s^{-1}$ |
|                                           | $\beta_{CI1}$  | 0.016028  | 0.077180  | 0.0442683  | 0.043349   | 0.268716 | $s^{-1}$ |
|                                           | $\alpha_{CI2}$ | 0.025614  | 0.256777  | 0.3286340  | 0.289347   | 0.167551 | $s^{-1}$ |
|                                           | $\beta_{CI2}$  | 0.016028  | 0.089063  | 0.0733105  | 0.058782   | 0.246698 | $s^{-1}$ |
|                                           | $\alpha_{CI3}$ | 0.025614  | 0.384429  | 0.4929490  | 0.426679   | 0.250234 | $s^{-1}$ |
|                                           | $\beta_{CI3}$  | 0.016028  | 0.100946  | 0.10235275 | 0.074215   | 0.224681 | $s^{-1}$ |
| Open–inactivated transitions              | $\alpha_{0I}$  | 0.001194  | 0.512082  | 0.657264   | 0.564011   | 0.332919 | $s^{-1}$ |
|                                           | $\beta_{0I}$   | 0.086253  | 0.112829  | 0.131395   | 0.089648   | 0.202663 | $s^{-1}$ |
| Open–open transition                      | $\lambda$      | 0.278176  | N/A       | N/A        | N/A        | N/A      | $s^{-1}$ |
|                                           | $\gamma$       | 0.738245  | N/A       | N/A        | N/A        | N/A      | $s^{-1}$ |
